# Supplementary material for: Propionate as the preferred carbon source to produce 3-indoleacetic acid in B. subtilis : comparative flux analysis using five carbon sources
Source: Royal Society of Chemistry journal article supplement (doi:10.1039/d1mo00039j), 2021-04-27
Supplement: d1mo00039j1.xlsx [file d1mo00039j1.xlsx]

## Sheet: Sheet1
Supplementary material A :
Calculation of the production cost of 1 g of IAA considering the costs of the substrates used.
			Substrates	Cost (1g)	Yp/s (g substrate/g IAA)	Coef. Mult	Unitary cost	Cost Tryptophan (1g)	Y p/s (g tryptophan/g IAA)	Coef. Mult2	Unitary cost3	Total Cost
			Glucose	0.68	0.59	1.41	0.9588	16.4	0.8	1.2	19.68	20.6388
			Acetate	0.1292	0.38	1.62	0.209304	16.4	0.88	1.12	18.368	18.5773
			Propionate	0.2	0.5	1.5	0.3	16.4	0.98	1.02	16.728	17.028
			Citrate	71	0.51	1.49	105.79	16.4	0.94	1.06	17.384	123.174
			Glycerol	1.74	0.44	1.56	2.7144	16.4	0.84	1.16	19.024	21.7384
Product	CAS-Number	Pack size (g)	Price (USD)	Cost (1g) (USD)
Glucose	492-62-6*	25	17	0.68
Acetate	127-09-3*	250	32.3	0.1292
Propionate	137-40-6*	100	20	0.2
Citrate	6132-04-04*	1	71	71
Glycerol**	56-81-5*	1	1.74	1.74
Tryotophan	73-22-3*	1	16.4	16.4
