# Supplementary material for: Propionate as the preferred carbon source to produce 3-indoleacetic acid in B. subtilis : comparative flux analysis using five carbon sources
Source: Royal Society of Chemistry journal article supplement (doi:10.1039/d1mo00039j), 2021-04-27
Supplement: d1mo00039j2.xlsx [file d1mo00039j2.xlsx]

## Sheet: Sheet1
Supplementary material B :
List of genes with metabolic role inspected manually
Protein	EC number	Gene	Organism	Length (aa)
2-oxoglutaramate amidase	(EC 3.5.1.111)	A3772-07430, B4122-1654,B4417-3817 C7M23-03357 GII81-07285	Bacillus subtilis	259
Carbon-nitrogen family hydrolase		BH660-07560 GN311-02630	Bacillus subtilis subsp. subtilis	259
Carbon-nitrogen family hydrolase		HCN55-07425	Bacillus subtilis subsp. subtilis str. SMY	259
Hydrolase	(EC 3.5.1.-)	mtnU C663-1398	Bacillus subtilis XF-1	259
CN hydrolase domain-containing protein		BSSC8-29340	Bacillus subtilis subsp. subtilis str. SC-8	259
Hydrolase		MtnU D9C22-07310	Bacillus sp. WR11	259
NAD(P)-binding protein		GN311-05510	Bacillus subtilis subsp. subtilis	478
Flavin monoamine oxidase family		HCN55-10310	Bacillus subtilis subsp. subtilis str. SMY	478
Monoamine oxidase		aofH BS16045-02028	Bacillus subtilis	478
