# Supplementary material for: Propionate as the preferred carbon source to produce 3-indoleacetic acid in B. subtilis : comparative flux analysis using five carbon sources
Source: Royal Society of Chemistry journal article supplement (doi:10.1039/d1mo00039j), 2021-04-27
Supplement: d1mo00039j4.xlsx [file d1mo00039j4.xlsx]

## Sheet: Sheet1
Supplementary material D:
Flux values used to restrict the iBSU1147+1 metabolic model. Fluxes are expressed in mmol/gWC/h.
Reaction	Glucose	Acetate	Propionate	Citrate	Glycerol
[e]: Glucose <==>	-1.15	0	0	0	0
[e]: Acetate <==>	0	-5.58	0	0	0
[e]: Propionate <==>	0	0	-4.49	0	0
[e]: Citratate <==>	0	0	0	-1.54	0
[e]: Glycerol <==>	0	0	0	0	-2.38
[c]: H2O +atp -> adp + PO4 + H+	5.85	5.85	5.85	5.85	5.85
[e]: Triptófano <==>	-1.65	-1.05	-1.45	-2.36	-1.71
[e] : O2 <==>	-15	-15	-15	-15	-15
[e] : C2 <==>	15	15	15	15	15
[e] : NH4 <==>	5	5	5	5	5
[e] : Fumarate <==>	0	0	0	0	0
[e] : Malate<==>	0	0	0	0	0
[e]: Maltose <==>	0	0	0	0	0
[e] : Chorismate <==>	0	0	0	0	0
[e] : Phospho-D-gluconate <==>	0	0	0	0	0
[e] : 2-Phospho-D-glicerate <==>	0	0	0	0	0
