# Supplementary material for: Propionate as the preferred carbon source to produce 3-indoleacetic acid in B. subtilis : comparative flux analysis using five carbon sources
Source: Royal Society of Chemistry journal article supplement (doi:10.1039/d1mo00039j), 2021-04-27
Supplement: d1mo00039j5.xlsx [file d1mo00039j5.xlsx]

## Sheet: Sheet1
Supplementary material E :
Values of the simulated flux distribution for B. subtilis using glucose as carbon source in exponential (A) and stationary phase (B). Fluxes are expressed in mmol/gWC/h.
Pathway/Reaction	Gene	Enzyme	A	B
Glicolysis
g6p <==> f6p	pgi	PGI	1.59	1.18
atp +f6p<==>adp +f1,6bf	pfk	PFK	1.43	0.05
f1,6bf <==> g3p +dhp	fbaA	FBA	1.43	0.05
g3p + nad + pi <==> 13dpg + h + nadh	gapA	GAP	1.34	0.4
atp + h + 3pg <==> adp + 13dpg	pgk	PGK	1.34	0.4
2pg <==> 3pg	pgm	PGM	1.34	-0.04
2pg <==> h2o + pep	eno	ENO	1.34	-0.04
adp + pep <==>atp + pyr	pyk	PYK	1.02	0.39
pyr + coa + nad <==>acoa + nadh + co2	pdh	PDH	4.12	3.14
TCA cycle
acoa + h2o + oaa <==> h + coa + cit	citZ	CIT	0.13	0.07
cit <==> acon-C + h2o	acnB	ACONTa	0.13	0.07
acon-C + h2o <==> icit	acnB	ACONTb	0.13	0.07
icit + nadp <==> akg + co2 + nadph	icd	ICDH	0.13	0.07
akg + coa + nad –> co2 + nadh + succoa	sucAB	AKGDH	0.02	0.04
atp + coa + succ <==> adp + pi + succoa	sucCD	SUCOAS	0.02	0.04
q8 + succ –> fum + q8h2	sdhC	SUCDI	0.08	0.04
fum + h2o <==> mal-L	fumA	FUM	0.08	0.04
mal-L + nad <==> h + nadh + oaa	mdh	MDH	0.08	0.04
Pentose Phosphate Pathway
ru5p <==> xu5p	rpe	RPE	-0.03	-0.02
r5p <==> ru5p	rpiA	RPI	-0.03	-0.02
e4p + xu5p-D <==> f6p + g3p	tktA	TKT2	-0.03	0.08
Gluconeogenesis and anaplerosis
atp + oaa –> adp + co2 + pep	pck	PPCK	0	0.22
atp + hco3 + pyr <==> adp + pi +h+oaa	pycA	PYK	0	0.14
mal-L + nad –> co2 + nadh + pyr	sfcA	ME1	0	0
mal-L + nadp –> co2 + nadph + pyr	maeA	ME2	0	0
IAA / Tryptophan metabolism
ser + igp <==> g3p + h2p + trp	trpA	TRP	-0.15	0.2
trp <==> iam	yobN I	aaM	0	1.85
h2o+ iam <==> nh4 + iaa	mtnU	IaaH	0	1.85
*The abbreviations are as follows: glucose 6-phosphate (g6p), fructose 6-phosphate (f6p), fructose 1,6-bisphosphate (f1,6bf), glyceraldehyde 3 phosphate (g3p), dihydroxyacetone phosphate (dhp), 1,3 bisphosphoglycerate (13dpg), 3-phosphoglycerate (3pg), 2-phosphoglycerate (2pg), phosphoenolpyruvate (pep), pyruvate (pyr), acetylcoa (acoa), oxaloacetate (oaa), citrate (cit), cis-aconitate (acon-C), …
