# Supplementary material for: Propionate as the preferred carbon source to produce 3-indoleacetic acid in B. subtilis : comparative flux analysis using five carbon sources
Source: Royal Society of Chemistry journal article supplement (doi:10.1039/d1mo00039j), 2021-04-27
Supplement: d1mo00039j6.xlsx [file d1mo00039j6.xlsx]

## Sheet: Fluxes
Supplementary material F :
Values of the simulated flux distribution for B. subtilis using five different carbon sources in stationary phase. Fluxes are expressed in mmol/gWC/h.
Pathway/Reaction	Gene	Enzyme	GLUCOSE	ACETATE	PROpiONATE	CITRATE	GLYCEROL
Glicolysis
g6p <==> f6p	pgi	PGI	1.182	-0.02	-0.017	-0.016	-0.021
atp +f6p<==>adp +f1,6bf	pfk	PFK	0.051	1.043	-0.596	-0.068	0.829
f1,6bf <==> g3p +dhp	fbaA	FBA	0.051	1.043	-0.596	-0.068	0.829
g3p + nad + pi <==> 13dpg + h + nadh	gapA	GAP	0.401	1.18	0.701	-0.289	0.695
atp + h + 3pg <==> adp + 13dpg	pgk	PGK	0.401	1.18	0.701	-0.289	0.695
2pg <==> 3pg	pgm	PGM	-0.401	-1.18	0.701	-0.289	-0.695
2pg <==> h2o + pep	eno	ENO	-0.401	-1.18	0.701	0.289	-0.695
adp + pep <==>atp + pyr	pyk	PYK	0.393	1.188	0.707	1.122	0.087
pyr + coa + nad <==>acoa + nadh + co2	pdh	PDH	3.14	1.416	2.289	1.065	3.086
TCA cycle
acoa + h2o + oaa <==> h + coa + cit	citZ	CIT	0.068	4.069	2.024	2.335	0.081
cit <==> acon-C + h2o	acnB	ACONTa	0.068	4.069	2.024	2.335	0.081
acon-C + h2o <==> icit	acnB	ACONTb	0.068	4.069	2.024	2.335	0.081
icit + nadp <==> akg + co2 + nadph	icd	ICDH	0.068	4.069	2.024	2.335	0.081
akg + coa + nad –> co2 + nadh + succoa	sucAB	AKGDH	0.039	4.069	2.024	2.335	0.081
atp + coa + succ <==> adp + pi + succoa	sucCD	SUCOAS	0.039	4.069	2.024	2.335	0.081
q8 + succ –> fum + q8h2	sdhC	SUCDI	0.039	3.986	4.903	2.309	0.047
fum + h2o <==> mal-L	fumA	FUM	0.039	3.986	4.94	2.309	0.047
mal-L + nad <==> h + nadh + oaa	mdh	MDH	0.039	3.986	4.94	1.187	0.047
Pentose Phosphate Pathway
ru5p <==> xu5p	rpe	RPE	-0.015	-0.09	-0.196	-0.031	-0.032
r5p <==> ru5p	rpiA	Rpi	-0.015	-0.09	-0.196	-0.031	-0.032
e4p + xu5p-D <==> f6p + g3p	tktA	TKT1	0.083	0.042	0.098	0.016	0.015
e4p + xu5p-D <==> f6p + g3p	tktA	TKT2	0.076	0.042	0.098	0.016	0.016
Gluconeogenesis and anaplerosis
atp + oaa –> adp + co2 + pep	pck	PPCK	0.217	0.321	0.741	0.295	0.446
atp + hco3 + pyr <==> adp + pi +hoaa	pycA	PYK	0.136	0.131	0.581	0.085	0.156
mal-L + nad –> co2 + nadh + pyr	sfcA	ME1	0	0.139	0.661	0.093	0
mal-L + nadp –> co2 + nadph + pyr	maeA	ME2	0	0.068	0.242	0.981	0
Shikimate / Chorismate metabolism
e4p +h2o + pep <==> pi + h + dahp	aroA	AROA	0	0	0	0	0
dahp <==> pi + h + 3hq	aroB	AROB	0	0	0	0	0
[c] : 3hq <==> h2o + 3hsk	aroC	AROC	0	0	0	0	0
nadp + sk <==> h + nadph + 3hsk	aroD	AROD	0	0	0	0	0
atp + sk <==>adp + sk3p	aroK	AROK	0	0	0	0	0
pep + sk3p <==> pi + h + 3esk5p	aroE	AROE	0	0	0	0	0
3esk5p <==> pi + h + cho	aroF	AROF	0	0	0	0	0
nh4 + cho <==> h + h2o + pyr + ant	trpE	TRPE	0	0	0	0	0
ant + prpp <==> Ppi + 5rant	trpD	TRPD	0	0	0	0	0
h + 5rant <==> h2o + o2 + igp	trpF	TRPF	0	0	0	0	0
atp+ r5p <==> amp + prpp	prs	PRPS	0.231	0.132	0.298	0.05	0.053
atp + prpp<==> ppi+ pr-atp	hisG	AtATP	0.00571834	0.0069437	0.00530989	0.00514651	0.00678032
h2o + L-glu + prpp <==> PPi + L-glu + 5prb	purF	PURF	0.012982	0.0157639	0.0120547	0.0116838	0.0153929
prpp + oro <==> ppi + oro5p	pyrE	PYRE	0.00854964	0.0103817	0.00793895	0.00769468	0.0101374
C00262 + prpp <==> ppi + imp	hpt	HPT	0.012982	0.0157639	0.0120547	0.0116838	0.0153929
2 h + qui + prpp <==> ppi + co2 + namn	nadC	NADC	0.173426	0.0739012	0.234512	0.00682329	0.0042329
Sumatorias de flujos	nadC	NADC	0.213658	0.122754	0.27187	0.0430321	0.0519365
IAA / Tryptophan metabolism
igp <==> g3p + indole	tsa	TSA	0.203	0.098	0.272	0.025	0.02
ser + igp <==> g3p + h2p + trp	trpA/trpB	TRP	0.203	0.098	0.272	0.025	0.02
trp <==> iam	yobN I	aaM	1.849	1.144	1.719	2.382	1.725
h2o+ iam <==> nh4 + iaa	mtnU	IaaH	1.849	1.144	1.719	2.382	1.725

## Sheet: Concentration data
Biomass (g DCW/L)
Time(h)	Glucose	Acetate	Propionate	Citrate	Glycerol
0	0.0192 ± 0.01	0.0194 ± 0.001	0.0196± 0.05	0.0173± 0.02	0.0358± 0.012
12	0.3237 ± 0.07	0.0587 ± 0.09	0.0496± 0.01	0.0453± 0.07	0.1178± 0.06
18	0.8170 ± 0.01	0.1209 ± 0.04	0.076± 0.03	0.0811± 0.04	0.2179± 0.03
24	1.4231 ± 0.09	0.1791 ± 0.05	0.1713 0.05	0.1344± 0.014	0.2787± 0.005
36	1.4667 ± 0.012	0.1934 ± 0.017	0.1985± 0.017	0.1945± 0.012	0.3004± 0.014
42	1.4738 ± 0.001	0.2031± 0.01	0.2087± 0.01	0.1963± 0.015	0.3062± 0.01
48	1.4721 ± 0.015	0.2027 ± 0.011	0.2084± 0.011	0.1978± 0.01	0.3039± 0.013
Sustrate (g/L)
Time(h)	Glucose	Acetate	Propionate	Citrate	Glycerol
0	2.1505 ± 0.120	0.9815 ± 0.010	1.1520 ± 0.011	2.6028 ± 0.013	1.4948 ± 0.010
12	0.6670 ± 0.090	0.8812 ± 0.070	1.0785 ± 0.067	2.3786 ± 0.071	1.3004 ± 0.080
18	0.2482 ± 0.070	0.4926 ± 0.060	0.9651 ± 0.058	2.3219 ± 0.061	1.0933 ± 0.063
24	0.1362 ± 0.050	0.2394 ± 0.050	0.9241 ± 0.042	0.3237 ± 0.050	0.4574 ± 0.040
36	0.0479 ± 0.010	0.1994 ± 0.040	0.8650 ± 0.028	0.0603 ± 0.042	0.4295 ± 0.050
42	0.0177 ± 0.014	0.1672 ± 0.030	0.8253 ± 0.040	0.0298 ± 0.001	0.3888 ± 0.002
48	0.01681 ± 0.011	0.0909 ± 0.010	0.7877 ± 0.025	0.0131 ± 0.005	0.3798 ± 0.006
IAA (g /L)
Time(h)	Glucose	Acetate	Propionate	Citrate	Glycerol
0	0.00001 ± 0.010	0.00071 ± 0.011	0.0008 ± 0.012	0.0009 ± 0.013	0.00007 ± 0.011
12	0.00087 ± 0.013	0.00019 ± 0.010	0.0009 ± 0.016	0.001 ± 0.011	0.00007 ± 0.013
18	0.00142 ± 0.009	0.0005 ± 0.008	0.0010 ± 0.007	0.001 ± 0.018	0.0018 ± 0.017
24	0.027105 ± 0.008	0.0368 ± 0.012	0.0480 ± 0.001	0.0239 ± 0.009	0.0323 ± 0.013
36	0.055365 ± 0.007	0.0516 ± 0.014	0.0643 ± 0.011	0.0495 ± 0.011	0.0658 ± 0.014
42	0.08191 ± 0.005	0.0847 ± 0.001	0.0835 ± 0.012	0.0740 ± 0.014	0.0850 ± 0.001
48	0.096405 ± 0.009	0.0931 ± 0.003	0.0860 ± 0.008	0.0939 ± 0.009	0.0947 ± 0.014
